# Supplementary material
Source: PubMed Central journal article supplement (PMC4571682)

### QTL1x5

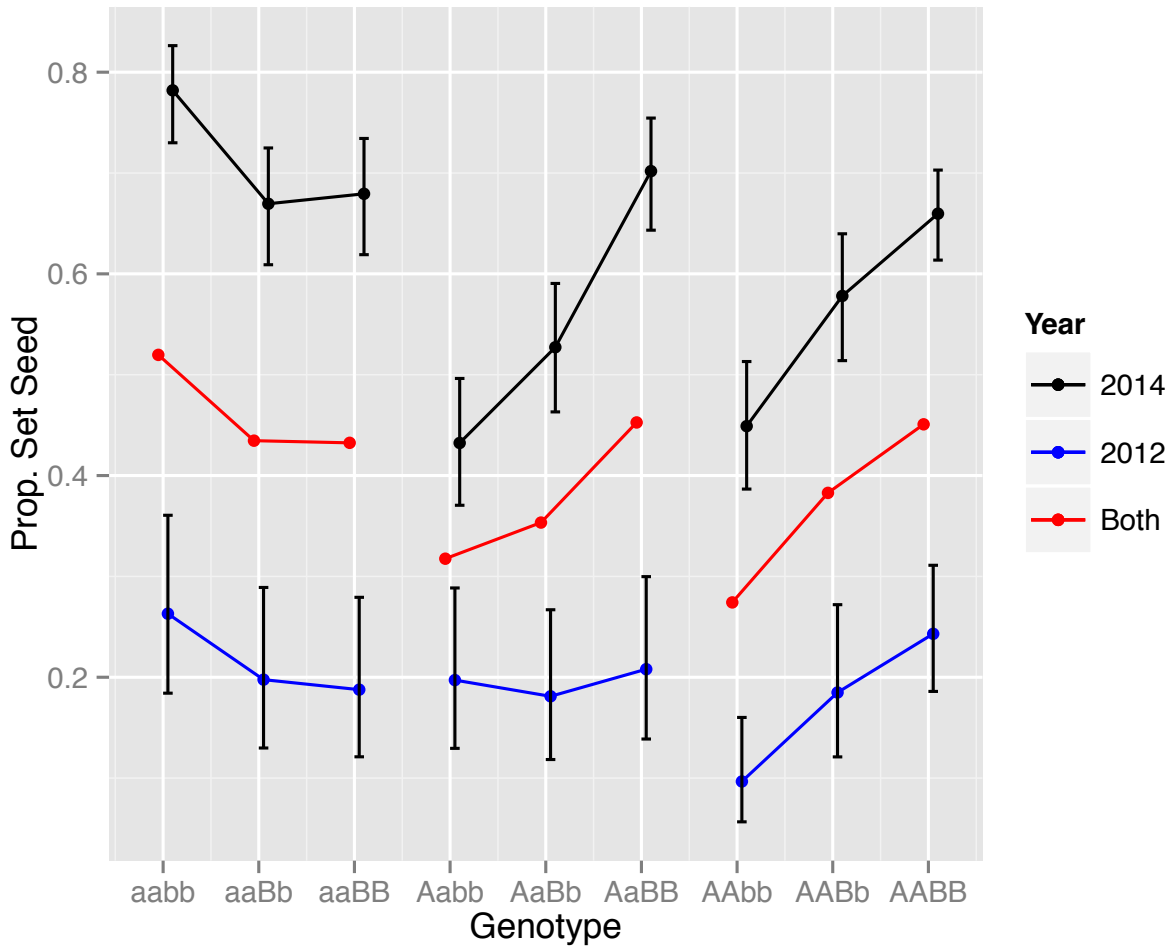

### QTL x10a -- QTL x5b

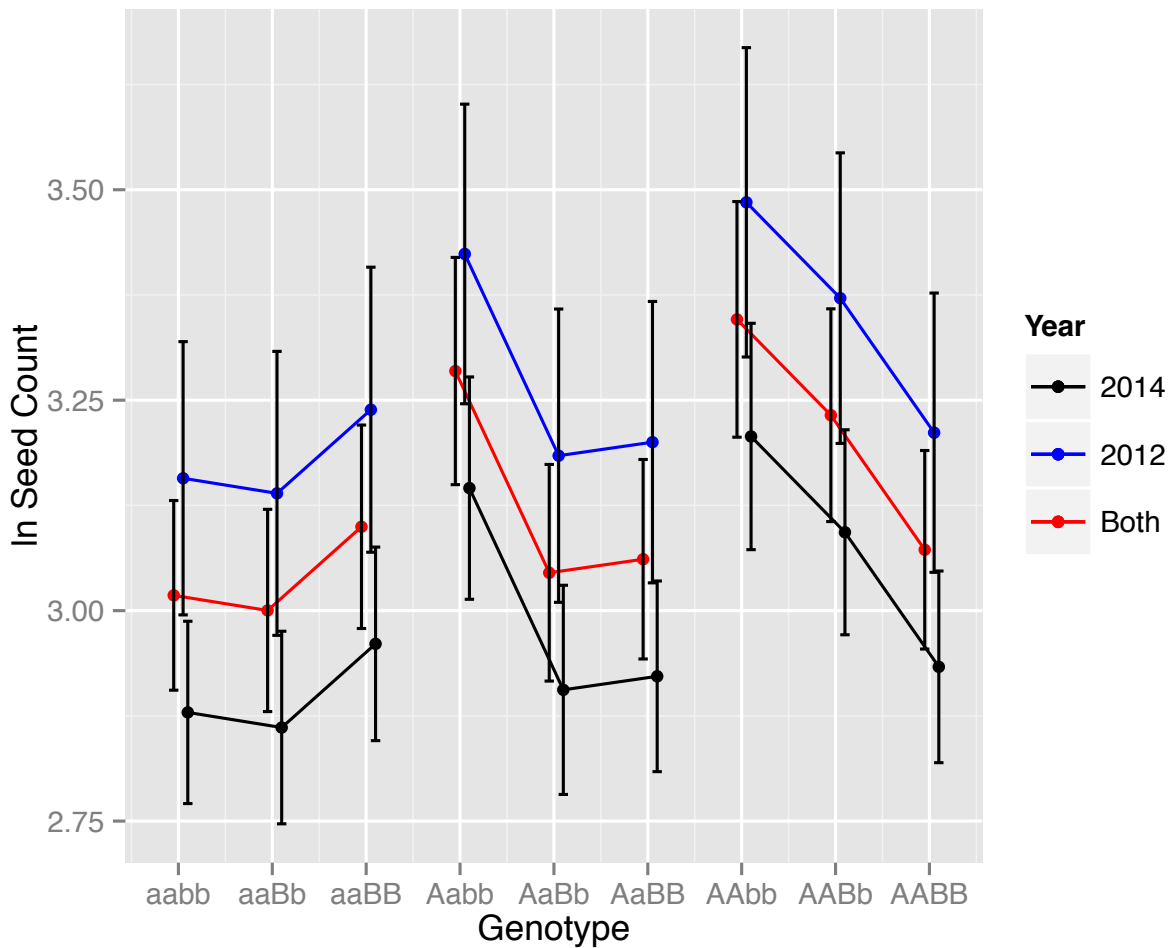

QTL x10a -- QTL x5b

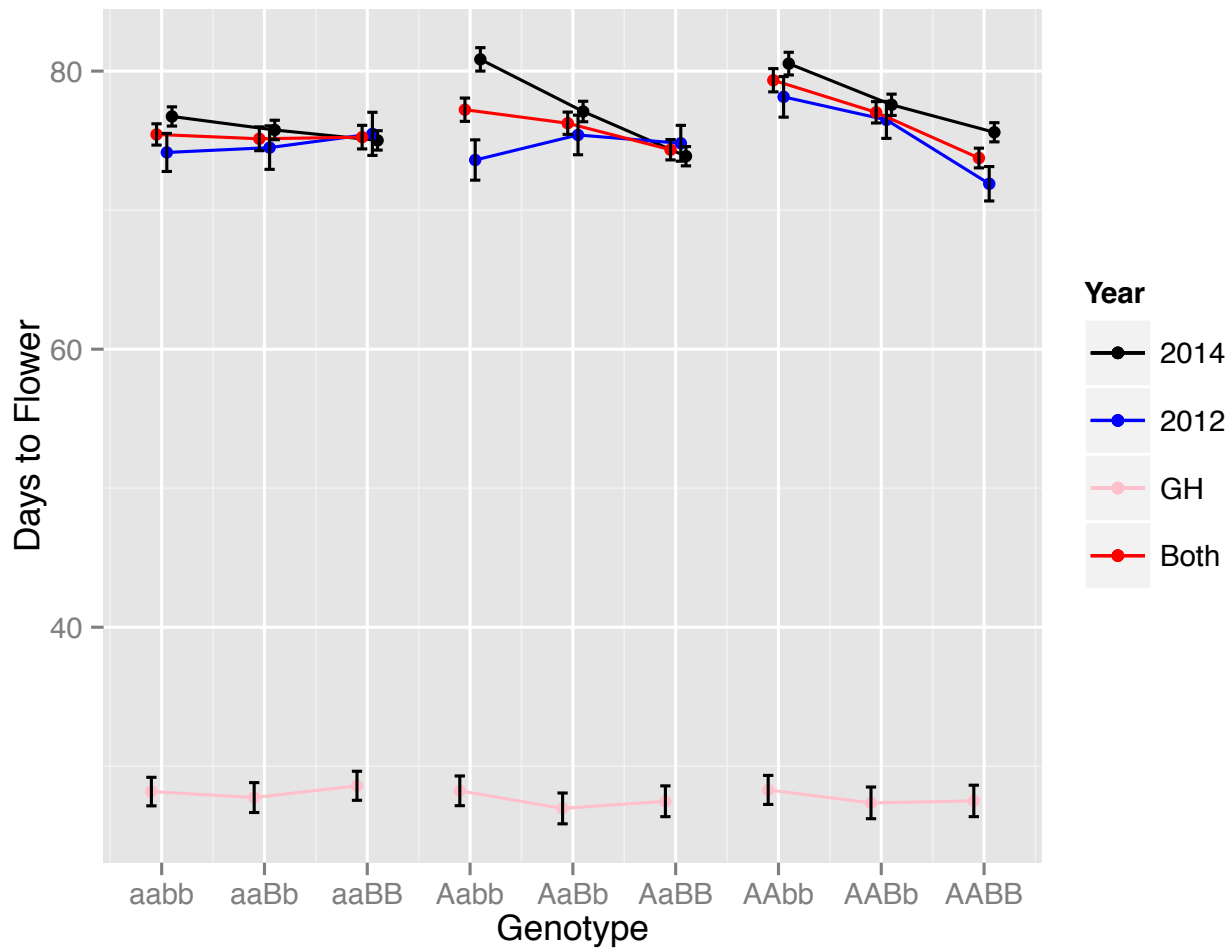

QTL x10a -- QTL x5b

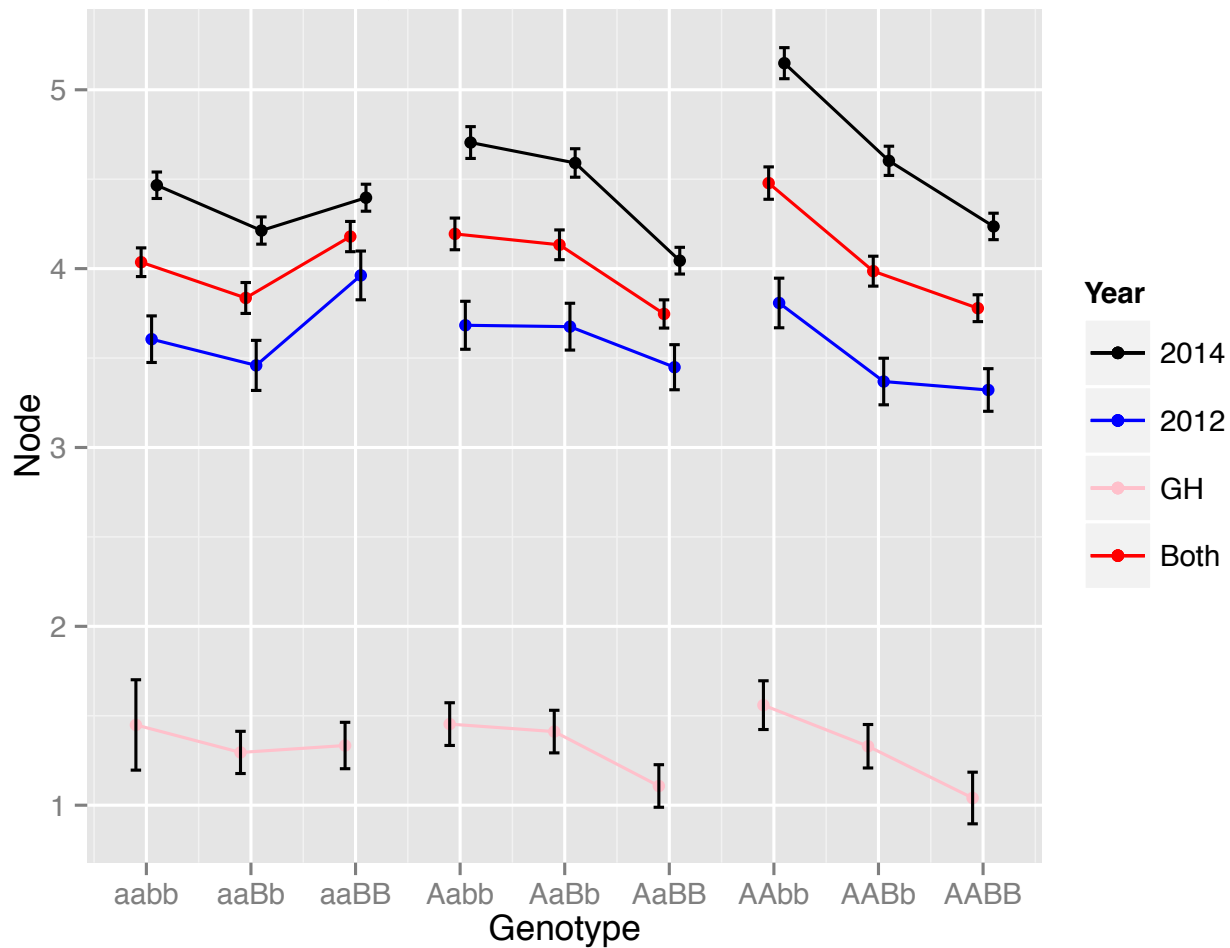

QTL x10a -- QTL x5b

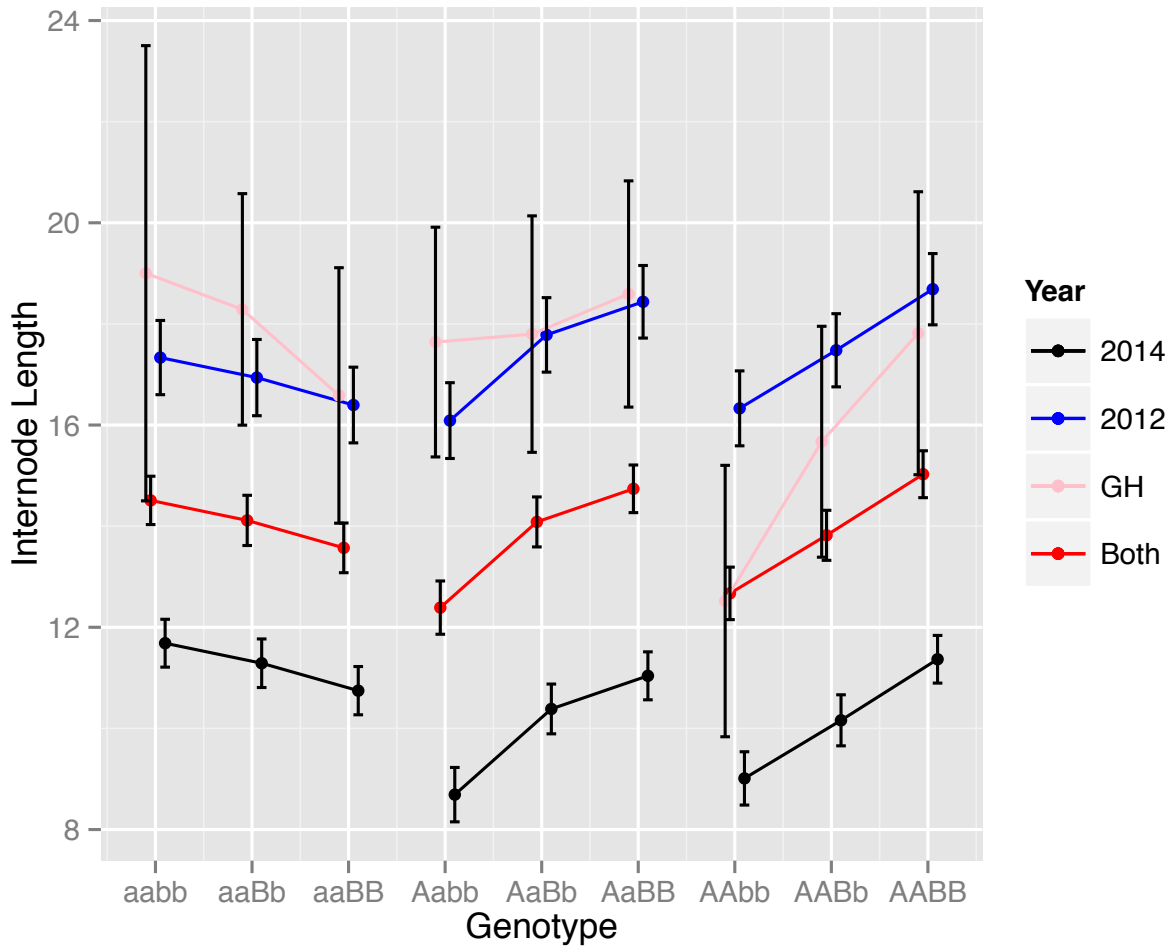

QTL x10a -- QTL x5b

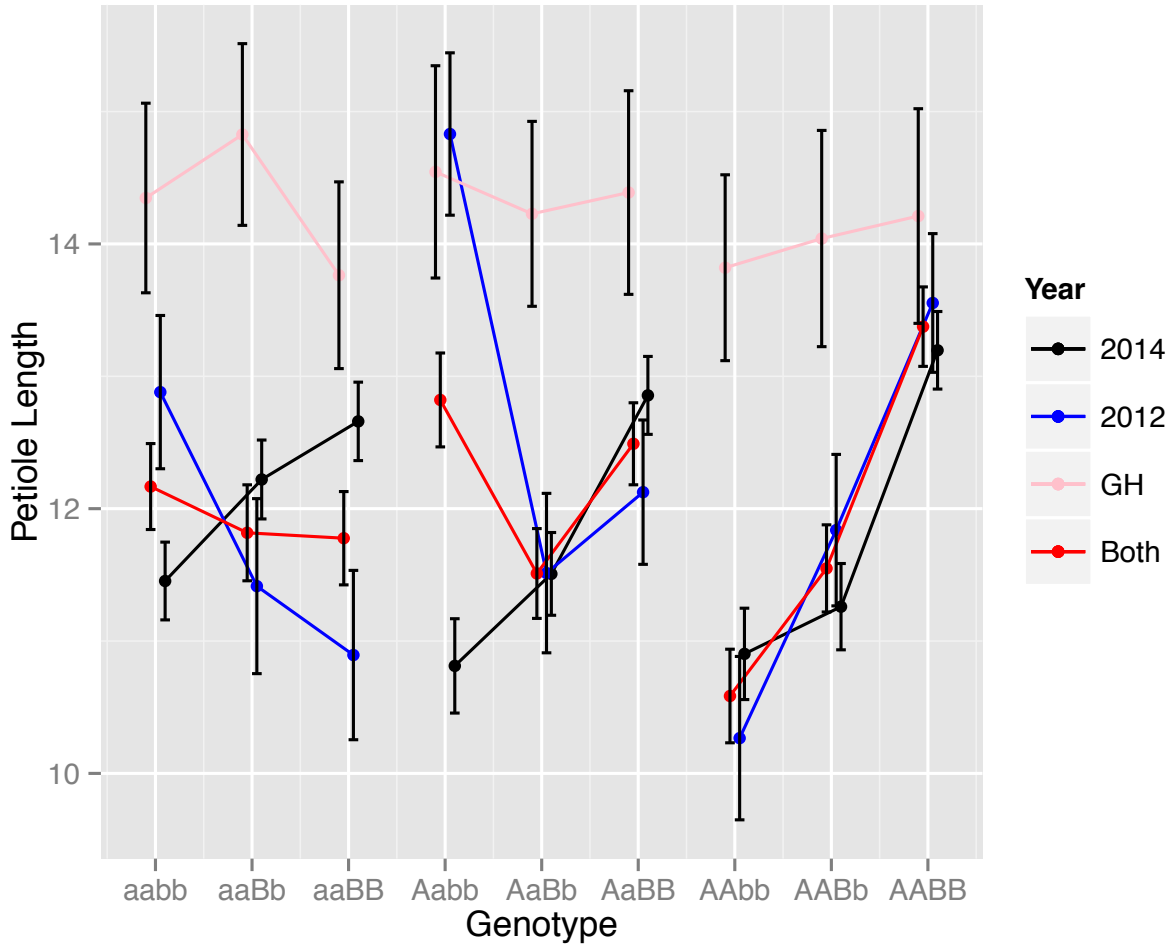

QTL x10a -- QTL x5b

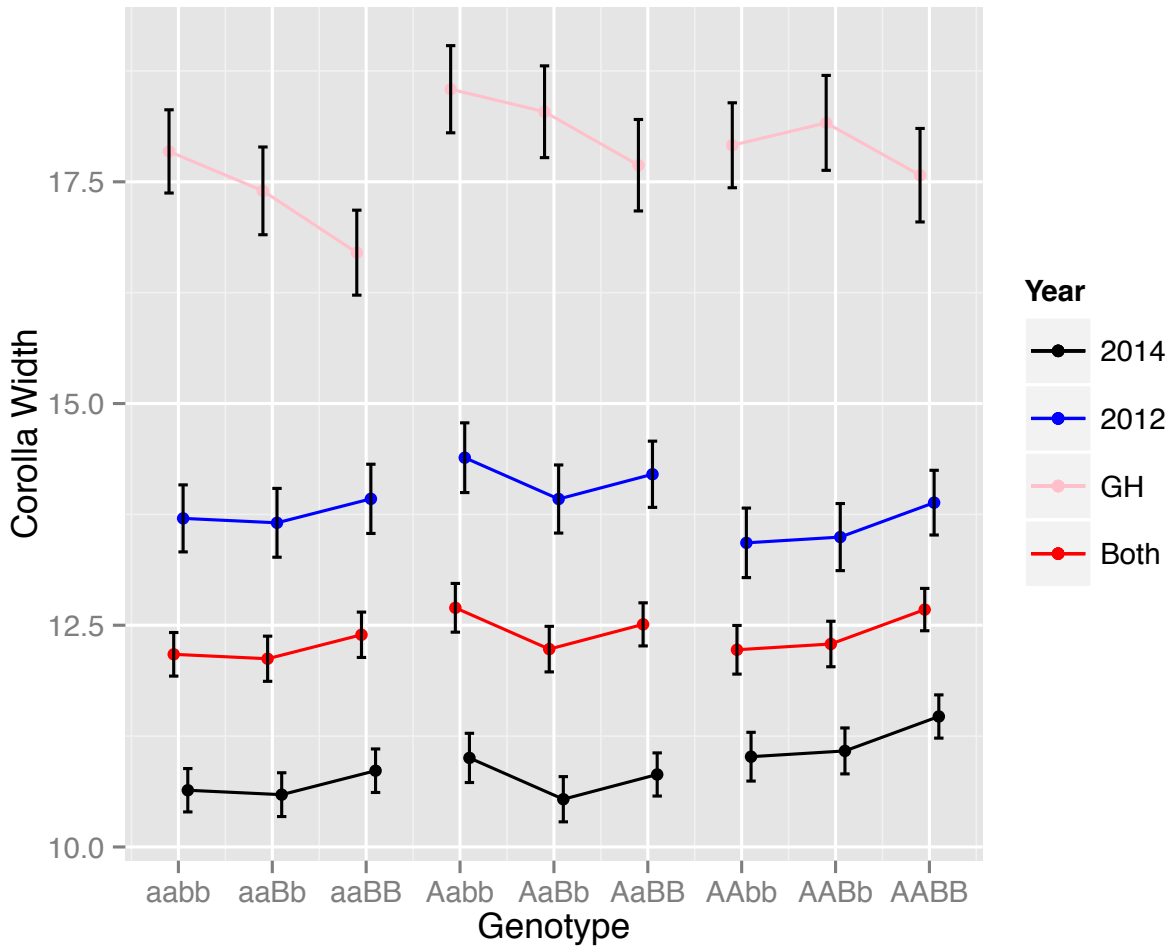

QTL x10a -- QTL x5b

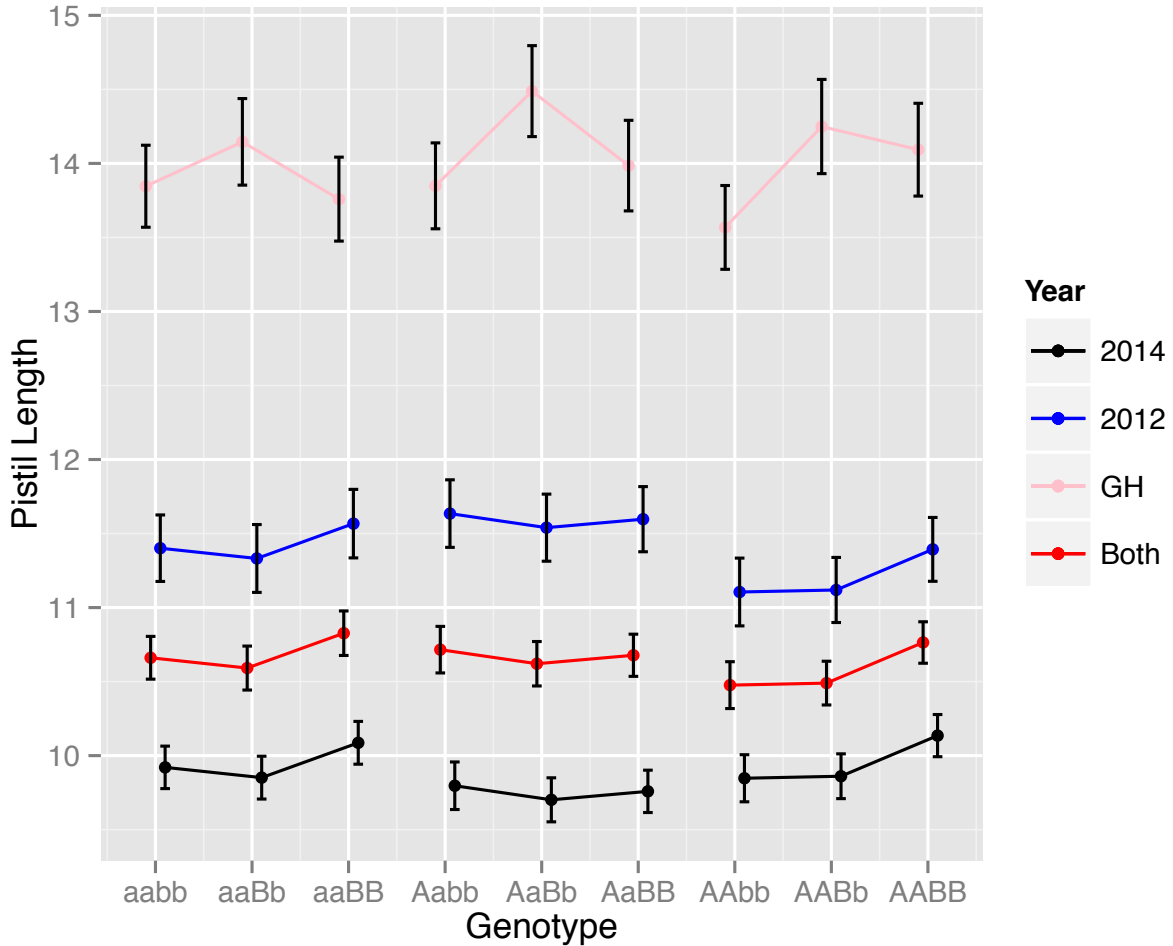

Supplement: rsbl20150498supp2.pdf [file rsbl20150498supp2.pdf]
